# Supplementary material
Source: publisher figshare collection journal article supplement (https://acs.figshare.com/ndownloader/files/11642492)
Supplement: Supplementary file 1 [file 11642492]

## Supporting Information

### **Techno-economic analysis and life-cycle analysis of two light-duty bio-blendstocks: isobutanol and aromatic rich hydrocarbons**

Hao Cai, <sup>1†</sup> Jennifer Markham, <sup>2\*</sup> Susanne Jones, <sup>3‡</sup> Pahola Thathiana Benavides, <sup>1</sup> Jennifer B. Dunn, <sup>1</sup> Mary Bidy, <sup>2</sup> Ling Tao, <sup>2</sup> Patrick Lamers, <sup>4</sup> Steven Phillips. <sup>3</sup>

1. Systems Assessment Group, Energy Systems Division, Argonne National Laboratory, 9700 S. Cass Avenue, Argonne, IL 60439, United States
2. National Bioenergy Center, National Renewable Energy Laboratory, 15013 Denver West Parkway, Golden, Colorado 80401, United States
3. Energy Processes and Materials Division, Pacific Northwest National Laboratory, 902 Battelle Blvd, Richland, WA 99354, United States
4. Bioenergy Technologies Group, Idaho National Laboratory, 2525 N Fremont Ave, Idaho Falls, ID 83415, United States

Corresponding authors

<sup>†</sup> Email: [hcai@anl.gov](mailto:hcai@anl.gov)

<sup>\*</sup> Email: [Jennifer.Markham@nrel.gov](mailto:Jennifer.Markham@nrel.gov)

<sup>‡</sup> Email: [sue.jones@pnnl.gov](mailto:sue.jones@pnnl.gov)

## **Aromatics and benzene blending limits**

In order to reduce harmful emissions from vehicles, the EPA has introduced regulations that set maximum and/or minimum limits on gasoline fuel components. For example, EPA limits the amount of benzene allowed in gasoline to no more than 1.3% by volume of gasoline.<sup>1</sup> This requirement started under the MSAT (Mobile Source Air Toxics) gasoline program in January 2011. The MSAT provide guidelines to reduce hazardous air pollutants or air toxics emitted by cars and trucks.<sup>2</sup> California, on the other hand, implemented more stringent standards to those proposed by EPA under the MSAT program. For example, gasoline sold in California has even lower benzene levels and limits its content to 1.1% by volume.<sup>3</sup> While EPA does not have a maximum limit on aromatics (i.e. benzene, toluene, ethylbenzene, xylenes, C9 and heavier and total aromatics), in California, the aromatics are limited to 35% by volume.<sup>3</sup>

## **Process flow diagram and process description of isobutanol**

As shown in Figure S1, the process begins with raw lignocellulosic feedstock (20 wt% moisture) being fed to the plant. Feedstock handling at a satellite depot transforms the biomass into a uniform size (0.15-0.25 in) and then pelletizes the milled material. Once the biomass pellets reach the conversion facility, a conveyor transports the material to pretreatment and conditioning. In all, it costs \$84.45/ton (2014) to purchase and process the biomass to the throat of the pretreatment reactor.<sup>4</sup> The plant processes 2,000 dry metric tons of biomass a day. Pretreatment steps follow the same methods as the NREL 2013 design report,<sup>5</sup> but are described briefly here. Dilute sodium hydroxide (17 mg/g dry biomass) combines with the biomass in the pretreatment reactor at 80°C. Following the one hour deacetylation reaction, screens at the bottom of the reactor dewater the resulting mixture to 30 wt% solids. This removes solubilized acetate and

undesirable inert species. A vertical vessel steams the biomass to 160°C and impregnates it with sulfuric acid (9 mg/g dry biomass), and then, with a residence time of five minutes, the biomass deconstructs in a horizontal pretreatment reactor at a pressure of 5.5 atm. Ammonia conditioning raises the discharged pretreatment reactor product stream to a pH of 5.

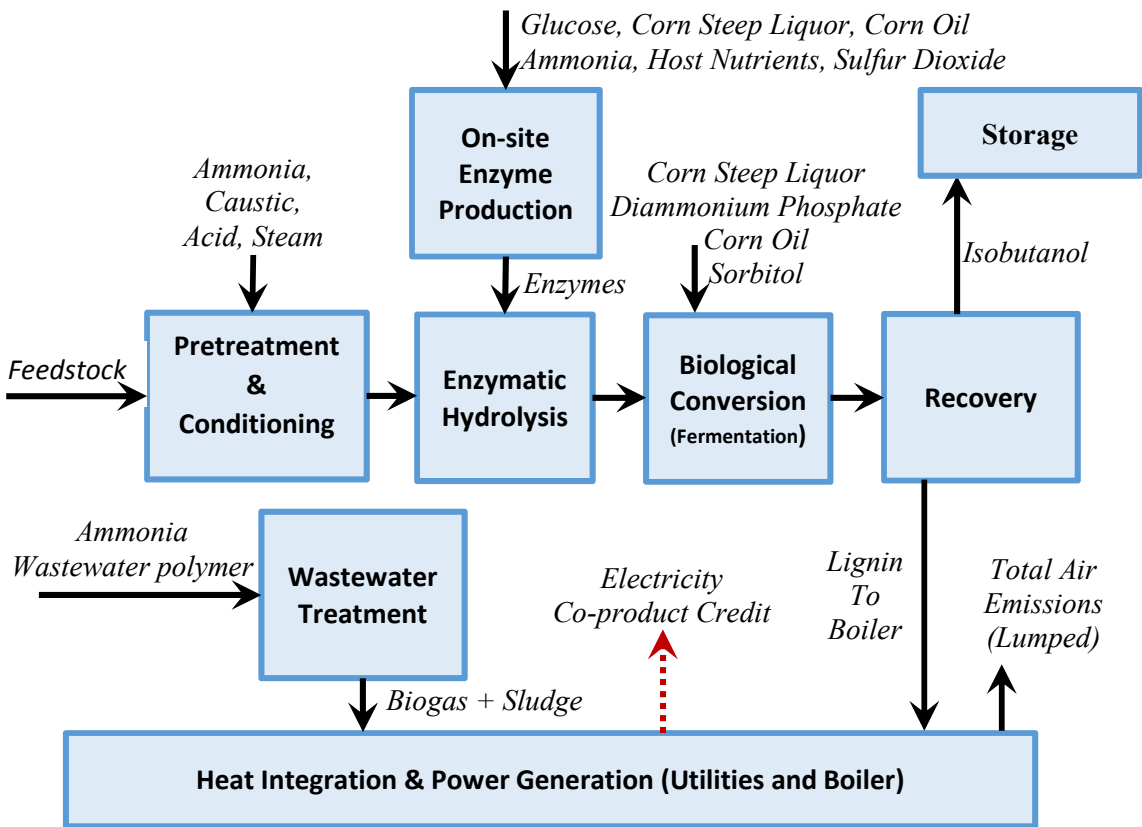

Figure S1 Isobutanol Process Flow Diagram

Similar to the pretreatment step, the enzyme production and enzymatic hydrolysis is based on the 2013 NREL design report and described in detail there.<sup>5</sup> To summarize, the process creates cellulose enzyme on-site using seed trains with five 300 m<sup>3</sup> aerobic fed-batch reactors. Target loading rates of protein to the enzymatic hydrolysis reactor are 10 mg protein/g cellulose. State-of-technology (SOT) loading rates have shown 12 mg/g cellulose for the enzymatic hydrolysis

reactor. Enzymatic hydrolysis converts cellulose to monomeric sugars. The hydrolysis starts with 20 wt% solids loading into eight continuous reactors (250,000 gallons). The continuous process takes 24 hours. Batch hydrolysis follows the continuous reactors and lasts 60 hours (3.5 days total). The SOT requires 5 days for the combined time of continuous hydrolysis and batch hydrolysis. In all, the conversion target case for hemicellulose to xylose is 90% and cellulose to glucose is 90%. Conversely, the SOT demonstrated conversion of hemicellulose to xylose is only 76% and cellulose to glucose of 74%. Dissimilar to more recent designs,<sup>5</sup> the hydrolysis material does not go through solid liquid separation and sugar concentration before being fed to the fermentation reaction. Instead, similar to previous ethanol fermentation designs,<sup>6</sup> we assume the fermentation can handle solids as well as lower sugar concentrations, and lasts 1.5 days.<sup>7</sup> SOT Fermentation time is set at 65 hours.<sup>8</sup>

The slurry from the batch hydrolysis reactors enters anaerobic reactors (1,000,000 gal tanks) where it is inoculated with metabolically engineered *Escherichia coli* that can convert both C5 and C6 sugars to isobutanol liquor.<sup>7</sup> The target case assumes that 95% of glucose, 85% of xylose, and 85% of arabinose go to isobutanol production. Cell-mass lactic acid and other minor co-products are also produced. SOT isobutanol fermentation from cellulosic materials operates at bench scale with low productivities (0.2 g/L/hr) with yields at 8% of glucose,<sup>9</sup> and only recent work on xylose.<sup>10</sup> However, GEVO argues that the productivities have reached commercial scale at 2 g/L/hr and 94% of the theoretical yield.<sup>8</sup> GEVO has reported a current yield of 59 gallons of isobutanol per bone dry ton of woody biomass.<sup>8</sup> We model the SOT case to have a yield of 59 gal isobutanol/ton biomass when pretreatment and enzymatic hydrolysis match target values. At lower pretreatment and enzymatic hydrolysis fermentable sugar yields, the isobutanol yield is 46 gal isobutanol/ton biomass.

Previous isobutanol process models,<sup>7</sup> discussed the use of continuous vacuum stripping as a means to remove isobutanol while anaerobic conversion is occurring. Vacuum stripping has the benefit of maintaining isobutanol titers below 2 wt%, as at higher isobutanol concentrations the cells can be stunted or killed. Added benefits of vacuum stripping are that it does not require additional reactor volume to accommodate additional gases and can be done in tandem with the fermentation. The resulting streams from fermentation and vacuum distillation then undergo separation and purification. The vent stream from the anaerobic reactors, containing CO<sub>2</sub>, enters a scrubber column that has additional water fed to it. The water recovers volatized isobutanol and returns it to the outlet liquid stream from the anaerobic reactors, which in turn is routed to a first distillation column. Isobutanol accumulates in the distillate in the first distillation column with water at a set ratio. Solids, remaining water, and other co-products coming out of the bottoms of the distillation column separate into solids and liquid streams via a solid-liquid separator. An on-site combustor uses the solids as feedstock, while the stillage water is routed to wastewater treatment for cleanup and ultimate reuse in the process.<sup>7</sup> The boiler unit produces on-site heat and electricity for the process to uses. Any additional electricity beyond the demands of the process is sold to the grid at \$0.0572/kWh consistent with prior design reports.<sup>5</sup> After the first distillation column, a decanter allows for the isobutanol and water to phase separate into an isobutanol rich stream and an aqueous rich stream. The aqueous stream returns to the first distillation column for higher isobutanol recovery rates. A second distillation column concentrates the isobutanol rich stream to 99 wt% with the bottoms being recycled back to the first distillation column. If co-products are produced above a specific threshold, then additional separation units may be required to reach a purified final isobutanol stream.

## **Process flow diagram and process description of aromatic-rich hydrocarbons (ARHC)**

As shown in Figure S2, the process begins with woody biomass feedstock (10 wt% moisture) being fed to the plant. Feedstock handling at a satellite depot transforms the biomass into a uniform size and then pelletizes the milled material. Once the biomass pellets reach the conversion facility, a conveyer transports the material to the gasifier. In all, it costs \$84.45/ton (2014) to purchase and process the biomass to the throat of the gasification reactor. The plant processes 2,000 dry metric tons of biomass a day. Gasification through mixed alcohols production (primarily ethanol) is describe in detail in a previous study,<sup>11</sup> and is briefly described here.

Synthesis gas from biomass gasification in an indirectly heated gasifier is conditioned by tar reforming to convert tars, methane and light hydrocarbons to additional hydrogen and carbon monoxide. Wet scrubbing is then used to remove particulates prior to compression where the cooled syngas is pressurized to 3,000 psia. The pressurized syngas is converted primarily to ethanol and a very small amount of propanol and butanol in a down-flow type shell-and-tube reactor. The tubes are filled with a sulfide-type catalyst operating at 300° C. The reactor is operated isothermally; the heat of reaction is removed via steam generation on the shell side. This steam along with steam generated from gas cooling in the gasification and tar reforming sections are used to generate high pressure steam, which in turn is used for power generation and process heating.

The alcohol conversion process involves two catalytic steps. In the first step, the wet alcohol product is near completely converted at 350° C using a modified zeolite (V-ZSM-5 or InV-ZSM-5) catalyst followed by distillation to light gases, liquefied petroleum gas (LPG) and C<sub>5+</sub>. The C<sub>5+</sub>

127 fraction is composed of aromatics and highly branched hydrocarbons.<sup>12</sup> Higher alcohols are also  
128 converted along with ethanol.<sup>13</sup> A portion of the light gases and LPG is recycled around the first  
129 reactor to convert the light olefins to additional C<sub>5+</sub> product. C<sub>4</sub>- olefins and paraffins not  
130 converted in the first reactor are routed to a second reactor containing Ga-ZSM-5 catalyst  
131 operating at 500° C to produce mixed aromatics.<sup>14</sup>

132 While the mixed aromatics from the second reactor could be further purified for chemical sales,  
133 in this study they are assumed to be blended into the C<sub>5+</sub> stream from the first reactor C<sub>5+</sub> fuel  
134 product. The alcohol-to-gasoline step and LPG conversion are in the experimental stages,<sup>12-14</sup>  
135 and ethanol production has been demonstrated.<sup>11</sup> It should be noted that the ARHC process is  
136 not limited to thermochemically derived alcohols, but is applicable to ethanol from any source  
137 (e.g., biochemical production).

138 In the SOT case, a significant quantity of C<sub>4</sub> paraffins is formed, not all of which is converted to  
139 liquid fuel in the second reactor. The second reactor produces a fair amount of benzene, which,  
140 when combined with the C<sub>5+</sub> fraction from the first reactor, limits the amount that can be blended  
141 into the gasoline pool. The target case assumes that the first reactor catalyst can be tuned to  
142 improve the selectivity towards more C<sub>5+</sub>, and that the second reactor catalyst can be formulated  
143 to reduce the benzene content in the second reactor product.

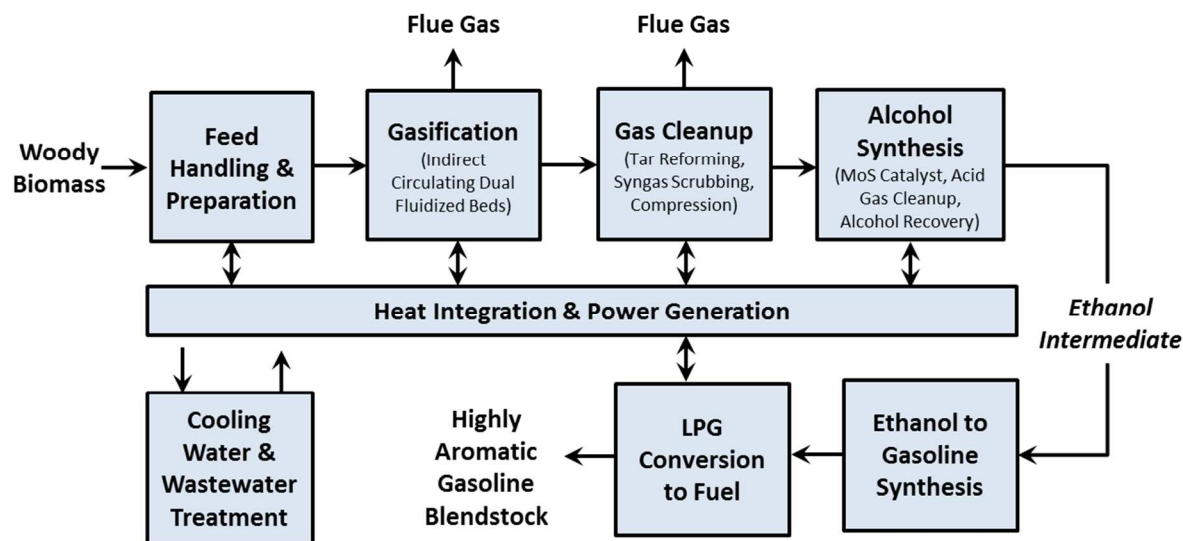

Figure S2 ARHC Process Flow Diagram

## System boundary of life-cycle analysis

The LCA system boundary that considers the biomass feedstock supply chain, biorefinery operations, and transportation and end-use of isobutanol and ARHC is presented in Figure S3.



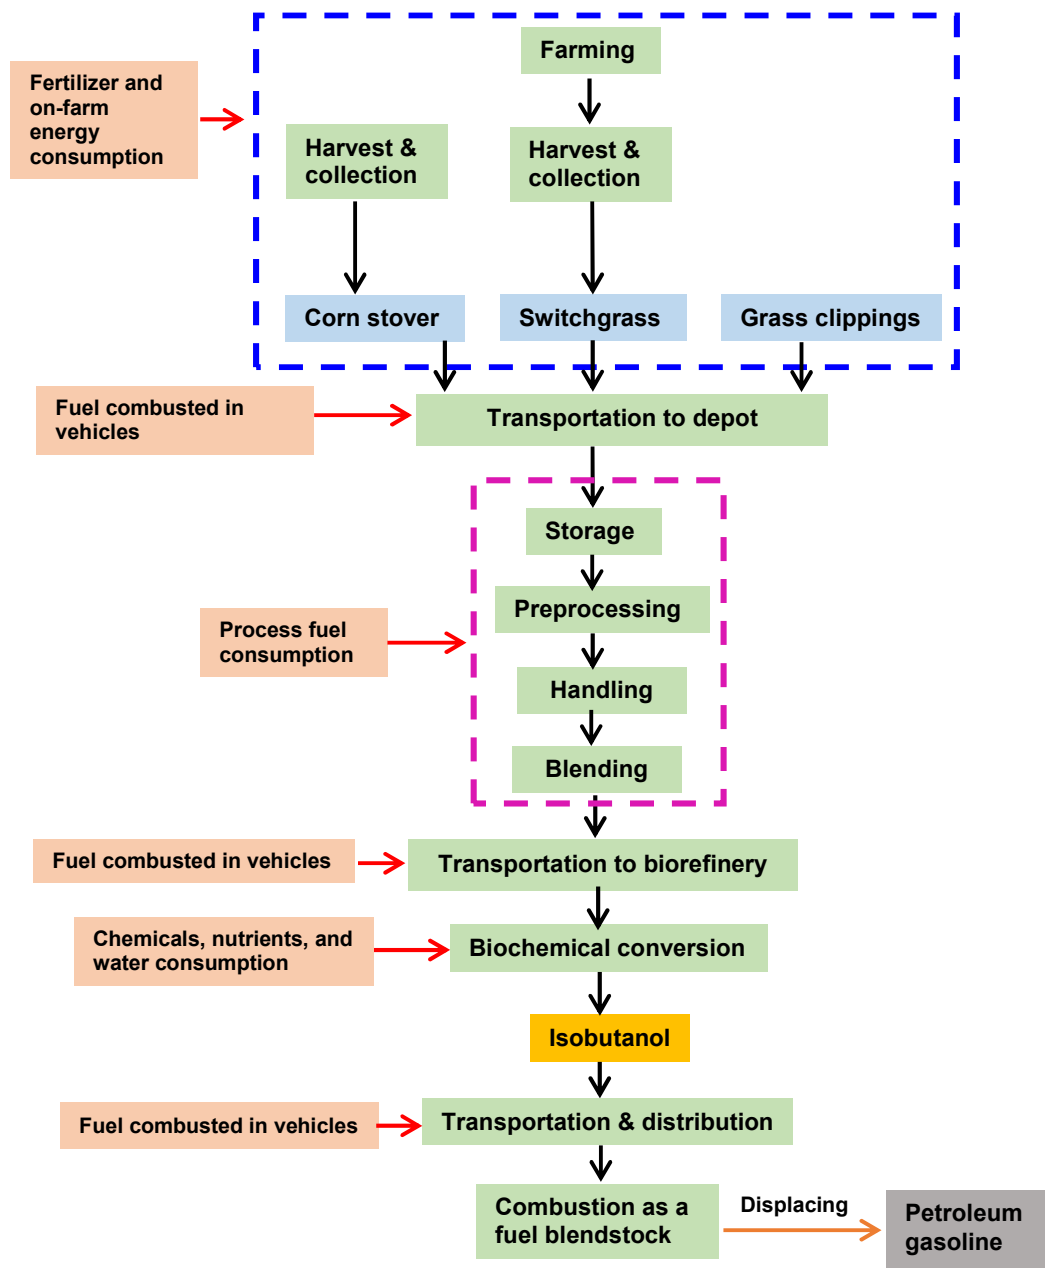

(a) Isobutanol

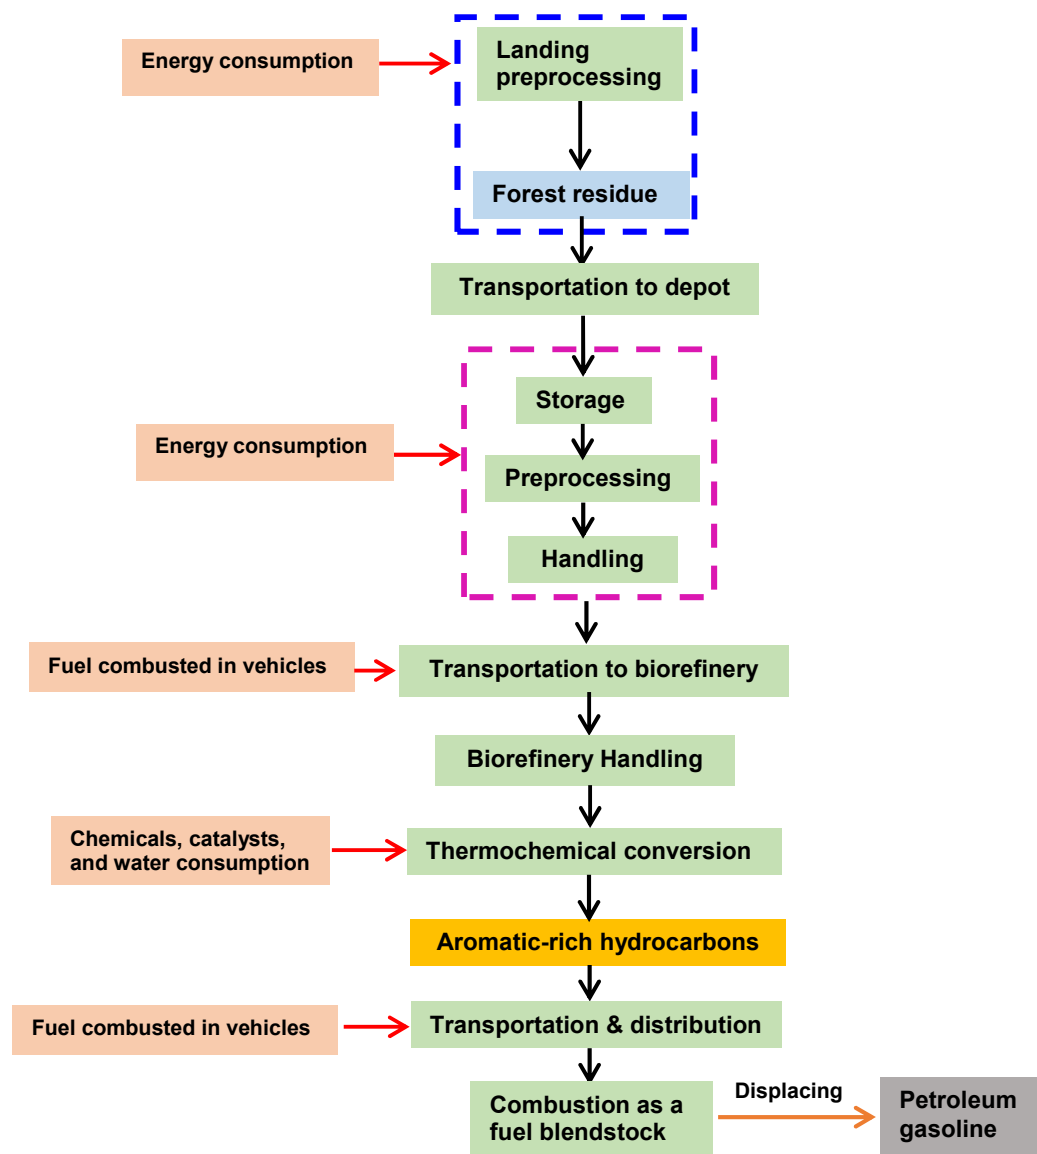

**(b) Aromatic-rich hydrocarbons**

Legend:

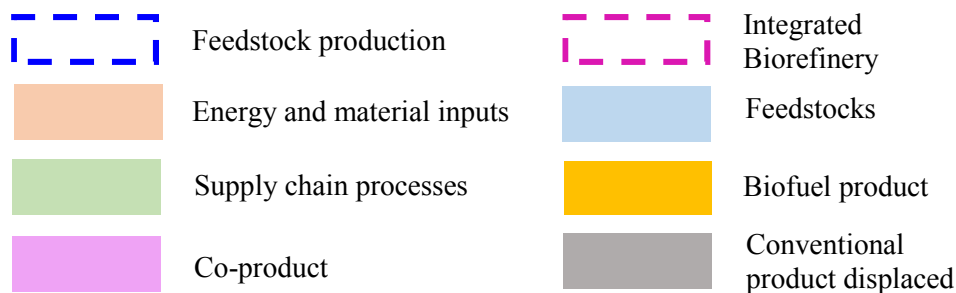

150

151 Figure S3. System boundary of life-cycle analysis of (a) isobutanol from biochemical conversion  
 152 of herbaceous blend feedstock; and (b) aromatic-rich hydrocarbons from thermochemical  
 153 conversion of forest residues.

**Key data and assumptions about herbaceous feedstock blend and woody forest residues**

Switchgrass fertilizer requirements and supplemental fertilizer requirements associated with corn stover were adopted based on GREET default values (see Table S1).<sup>15, 16</sup> Data regarding energy consumption during switchgrass farming, harvesting, and logistic operation are also reported in detail in Table S2. A transition from three-pass corn stover harvest to two-pass harvest reduces feedstock logistics costs and contributes to both an improvement in the overall efficiency of the harvest operations and a reduction in ash content.<sup>17</sup> The next logistics step is biomass storage. To enhance the biomass ease of conversion, the design case reduces storage-related dry matter losses of corn stover and switchgrass to 8% and 6%, respectively, through the minimization of microbial activity in storage, principally through controlled limitation of moisture content and/or oxygen in stored herbaceous feedstock. Processing of all feedstock components includes a preprocessing operation, which consumes mostly electricity. This operation includes size reduction, separation/sorting, drying, densification, ash reduction, and feedstock formation/blending. Details of fuel type and share for each feedstock preprocessing operation can be found in Table S3. Parameters used to determine energy consumed during feedstock transportation are shown in Table S4.

Table S1 presents switchgrass fertilizer requirements and supplemental fertilizer requirements associated with corn stover were adopted based on GREET default values.<sup>15, 16</sup>

Table S1 Fertilizer usage, in gram/dry ton, of corn stover collection and switchgrass farming.<sup>15, 16</sup>

| Nitrogen (N) | Phosphate (P <sub>2</sub> O <sub>5</sub> ) | Potash (K <sub>2</sub> O) | Calcium carbonate | Herbicides |
|--------------|--------------------------------------------|---------------------------|-------------------|------------|
|--------------|--------------------------------------------|---------------------------|-------------------|------------|

|             |       |       |        | (CaCO <sub>3</sub> ) |    |
|-------------|-------|-------|--------|----------------------|----|
| Corn stover | 3,183 | 2,273 | 13,641 | 0                    | 0  |
| Switchgrass | 4,877 | 2,308 | 3,200  | 5,847                | 53 |

Table S2 shows the energy consumption of production and logistics related to the herbaceous feedstock blend. Diesel consumption during switchgrass farming was taken from GREET default data,<sup>18</sup> while harvesting and logistics operations are based on modeling by INL.<sup>17</sup>

Table S2 Energy consumption, in Btu/dry ton, for feedstock production and logistics

|                                         | Corn Stover (two-pass) | Corn Stover (three-pass) | Switchgrass | Grass Clipping |
|-----------------------------------------|------------------------|--------------------------|-------------|----------------|
| Farming <sup>17, 18</sup>               |                        |                          | 26,207      |                |
| Harvesting and Collection <sup>17</sup> | 108,560                | 89,040                   | 41,270      |                |
| Storage <sup>17</sup>                   | 10,920                 | 10,920                   | 10,920      | 8,720          |
| Preprocessing <sup>17</sup>             | 236,870                | 236,870                  | 318,000     | 317,190        |
| Handling <sup>17</sup>                  | 8,230                  | 8,230                    | 7,750       | 19,500         |
| Biorefinery handling <sup>17</sup>      | 660                    | 660                      | 610         | 1,170          |

Table S3 presents the fuel type and share for each feedstock. As it is mentioned in the main paper, processing of all feedstock components includes a preprocessing operation, storage and handling. Electricity is the main source of energy for these unit operations.

Table S3 Share (%) of production and logistics stage fuel type for each feedstock.<sup>17</sup>

|                        | Corn Stover (two-pass) | Corn Stover (three-pass) | Switchgrass | Grass Clipping |
|------------------------|------------------------|--------------------------|-------------|----------------|
| Harvest and Collection |                        |                          |             |                |

|                             | <b>Corn Stover<br/>(two-pass)</b> | <b>Corn Stover<br/>(three-pass)</b> | <b>Switchgrass</b> | <b>Grass<br/>Clipping</b> |
|-----------------------------|-----------------------------------|-------------------------------------|--------------------|---------------------------|
| -Diesel                     | 100%                              | 100%                                | 100%               | -                         |
| <b>Depot Preprocessing</b>  |                                   |                                     |                    |                           |
| -Electricity                | 100%                              | 100%                                | 100%               | 100%                      |
| <b>Depot Storage</b>        |                                   |                                     |                    |                           |
| -Electricity                | 100%                              | 100%                                | 100%               | 100%                      |
| <b>Depot Handling</b>       |                                   |                                     |                    |                           |
| -Diesel                     | 10%                               | 10%                                 | 11%                | 14%                       |
| -Electricity                | 90%                               | 90%                                 | 89%                | 86%                       |
| <b>Biorefinery Handling</b> |                                   |                                     |                    |                           |
| -Electricity                | 100%                              | 100%                                | 100%               | 100%                      |

188

189 Table S4 summarizes the key parameters of biomass transportation to a centralized depot and a  
190 biorefinery.<sup>17</sup> Logistics and fuel combustion emission data pertinent to the last two stages of the  
191 supply chain, fuel transportation and distribution and fuel combustion, were obtained from  
192 GREET.

193 Table S4 Feedstock transportation parameters for herbaceous blend.<sup>17</sup>

|                                          |                                     | <b>Corn Stover<br/>(two-pass)</b> | <b>Corn Stover (three-pass)</b> | <b>Switchgrass</b> | <b>Grass<br/>Clipping</b> |
|------------------------------------------|-------------------------------------|-----------------------------------|---------------------------------|--------------------|---------------------------|
| <b>Transportation<br/>to depot</b>       | Truck payload<br>(wet tons)         | 18                                | 18                              | 19                 | 21                        |
|                                          | Transportation<br>distances (miles) | 30                                | 18                              | 36                 | 220                       |
| <b>Transportation<br/>to biorefinery</b> | Truck payload<br>(wet tons)         | 21                                | 21                              | 21                 |                           |
|                                          | Transportation<br>distances (miles) | 74                                | 62                              | 30                 |                           |

194

195 There are several feedstock logistics operations for woody forest residues including landing  
196 preprocessing/sorting, which consumes mostly diesel for steps of debarking, size reduction,

sorting, and screening. The transportation, depot storage, preprocessing, and handling stages consume mostly electricity. Energy requirements during feedstock logistics are shown in Table S5.

Table S5 Energy consumption, in Btu/dry ton, for forest residue logistics.<sup>19</sup>

|                               | <b>Forest Residues</b> |
|-------------------------------|------------------------|
| Landing Preprocessing/Sorting | 158,480                |
| Depot Storage                 | 8,720                  |
| Depot Preprocessing           | 482,950                |
| Depot Handling                | 12,230                 |
| Biorefinery Handling          | 140                    |

Table S6 presents the shares of fuel types related to the logistics of forest residues.

Table S6. Shares (%) of fuel types for forest residue logistics.<sup>19</sup>

|                              | <b>Diesel</b> | <b>Electricity</b> |
|------------------------------|---------------|--------------------|
| <b>Landing</b>               | 100%          | -                  |
| <b>Preprocessing/Sorting</b> | 100%          | -                  |
| <b>Transportation</b>        | 100%          | -                  |
| <b>Depot Preprocessing</b>   |               | 100%               |
| <b>Depot Storage</b>         | 100%          | -                  |
| <b>Depot Handling</b>        |               | 100%               |
| <b>Biorefinery Handling</b>  | -             | 100%               |

Parameters used to determine energy consumed during feedstock transportation are shown in Table S7. Vehicle payloads, transportation distance and moisture content, were informed by feedstock techno-economic analysis.<sup>19</sup>

Table S7. Feedstock transportation parameters

|                                |                                  |     |
|--------------------------------|----------------------------------|-----|
| <b>Transportation to depot</b> | Truck payload (wet tons)         | 17  |
|                                | Transportation distances (miles) | 70  |
|                                | Moisture content (wt%)           | 30% |

|                                      |                                  |     |
|--------------------------------------|----------------------------------|-----|
| <b>Transportation to biorefinery</b> | Truck payload (wet tons)         | 21  |
|                                      | Transportation distances (miles) | 200 |
|                                      | Moisture content (wt%)           | 10% |

## Life-cycle analysis: Methodology to calculate NO<sub>x</sub> and PM<sub>2.5</sub> emissions

The production of bio-blendstocks and their end-use by vehicles involves combustion processes that produce NO<sub>x</sub> and PM<sub>2.5</sub> emissions. The process activities associated with bio-blendstock production pathways consume a diversified mix of process fuels by multiple combustion technologies with varying energy efficiencies and emission performances. For a given bio-blendstock, we applied a combustion technology-based approach to estimating the life-cycle NO<sub>x</sub> and PM<sub>2.5</sub> emissions of each life-cycle stage with the GREET model, using Equation S1.

$$LC_{CAP_{s,b}} = \left\{ \sum_p \sum_i \sum_j \left[ \left( \frac{1}{\eta_p} - 1 \right) \times PF_{p,i} \times CT_{p,i,j} \times EF_{CAP_{s,i,j}} \right] + \sum_p \sum_i \left[ Upstream_{CAP_{s,i}} \times \left( \frac{1}{\eta_p} - 1 \right) \times PF_{p,i} \right] \right\} + VO_{CAP_{s,b}} \quad (S1)$$

Where  $LC_{CAP_{s,b}}$  is the life-cycle emissions of criteria air pollutant (CAP)  $s$  (either NO<sub>x</sub> or PM<sub>2.5</sub>), for bio-blendstock  $b$  (either isobutanol or ARHC);  $\eta_p$  is the energy efficiency of process  $p$ ;  $PF_{p,i}$  is the share of process fuel  $i$  in process  $p$ ;  $CT_{p,i,j}$  is the share of combustion technology  $j$  of process fuel  $i$  in process  $p$ ;  $EF_{CAP_{s,i,j}}$  is the emission factor of CAP  $s$  for using process fuel  $i$  by combustion technology  $j$  (g/MJ);  $Upstream_{CAP_{s,i}}$  is the upstream, or fuel-cycle emission of CAP  $s$  from production of process fuel  $i$  (g/MJ); and  $VO_{CAP_{s,b}}$  are the vehicle tailpipe emissions of CAP  $s$  from vehicle operations (g/MJ).

## Life-cycle analysis: Biorefinery-level results

Table S8 summarizes the biorefinery-level results of the target case, in comparison to the lower and higher fuel yield sensitivity cases, for ARHC. It shows that with higher fuel yield per ton of biomass converted, the total net emission reduction of the biorefinery increases, compared to the target and lower fuel yield cases.

Table S8. ARHC biorefinery-level GHG emission (in tons/year, assuming the biorefinery operates 350 days/year) results of the target case, in comparison to the lower and higher fuel yield sensitivity cases

|                                                            | Target case     | Lower yield     | Higher yield    |
|------------------------------------------------------------|-----------------|-----------------|-----------------|
| Biorefinery-level total emissions                          | 158,515         | 122,551         | 184,917         |
| Emission credit from displacing petroleum gasoline by ARHC | -579,948        | -525,025        | -636,733        |
| <b>Net emission reduction</b>                              | <b>-421,434</b> | <b>-402,474</b> | <b>-451,816</b> |

## Key assumptions of sensitivity cases for TEA

Table S9 provides single-point sensitivity values that are considered in TEAs for isobutanol and ARHC. For Isobutanol, the assumptions include financial and cost values such as the return on investment, total capital costs, biomass cost, and interest rate. Other assumptions relate to the process model such as the conversion of xylose to isobutanol, enzyme loading, the cellulose to glucose for enzymatic hydrolysis, and fermentation time. For ARHC, financial assumptions, capital costs, operating costs and fuel yield were varied. For both bio-blendstocks, reasonable minima and maxima for each variable were chosen.

Table S9 Assumptions in the sensitivity analysis

| Assumption Name | Min | Baseline | Max |
|-----------------|-----|----------|-----|
| Isobutanol      |     |          |     |



|                                           |      |          |      |
|-------------------------------------------|------|----------|------|
| Return on Investment                      | 0%   | 10%      | 15%  |
| Total CAPEX                               | 80%  | Baseline | 140% |
| Conversion of Xylose to Isobutanol        | 90%  | 85%      | 50%  |
| Enzyme Loading (mg/g)                     | 5    | 10       | 20   |
| Enzymatic Hydrolysis Cellulose to Glucose | 95%  | 90%      | 75%  |
| Biomass Cost (\$/ton)                     | \$75 | \$84     | \$90 |
| Interest Rate                             | 6%   | 8%       | 10%  |
| FERM time (day)                           | 1    | 1.5      | 3    |
| <b>ARHC</b>                               |      |          |      |
| Return on Investment                      | 0%   | 10%      | 15%  |
| Interest Rate                             | 6%   | 8%       | 10%  |
| Fuel Yield                                | 110% | Baseline | 90%  |
| Biomass Cost (\$/ton)                     | \$75 | \$84     | \$90 |
| Total CAPEX                               | 80%  | Baseline | 140% |
| Syngas Compressor                         | 80%  | Baseline | 140% |
| Gasifier and Reformer                     | 75%  | Baseline | 125% |
| Mixed Alcohol Reactor                     | 80%  | Baseline | 140% |
| Hydrocarbon Fuel                          | 80%  | Baseline | 140% |

247

## 248 **Key assumptions of sensitivity cases for LCA**

249 Tables S10 and S11 provide process chemical, energy, and water consumption in sensitivity  
250 cases for isobutanol and ARHC, respectively.

251 Table S10. Energy and material requirement, in gram, gallon, or mmBtu/mmBtu, for isobutanol production in the sensitivity cases, in  
252 comparison to the target case

|                                     | <b>Target<br/>Case</b> | <b>Low Enzyme<br/>Loading<br/>(5mg/g)</b> | <b>High<br/>Enzyme<br/>Loading<br/>(20mg/g)</b> | <b>Enzymatic<br/>Hydrolysis<br/>Cellulose<br/>Conversion<br/>to Glucose<br/>(75%)</b> | <b>Enzymatic<br/>Hydrolysis<br/>Cellulose<br/>Conversion<br/>to Glucose<br/>(95%)</b> | <b>Conversion<br/>of Xylose to<br/>Isobutanol<br/>(50%)</b> | <b>Conversion<br/>of Xylose to<br/>Isobutanol<br/>(90%)</b> |
|-------------------------------------|------------------------|-------------------------------------------|-------------------------------------------------|---------------------------------------------------------------------------------------|---------------------------------------------------------------------------------------|-------------------------------------------------------------|-------------------------------------------------------------|
| <b>Sulfuric Acid</b>                | 4003                   | 4003                                      | 4003                                            | 4426                                                                                  | 3880                                                                                  | 4605                                                        | 3930                                                        |
| <b>Caustic</b>                      | 2702                   | 2702                                      | 2702                                            | 2987                                                                                  | 2619                                                                                  | 3108                                                        | 2652                                                        |
| <b>Ammonia</b>                      | 899                    | 844                                       | 1011                                            | 1001                                                                                  | 859                                                                                   | 1180                                                        | 866                                                         |
| <b>Corn steep liquor</b>            | 1828                   | 1755                                      | 1999                                            | 1997                                                                                  | 1775                                                                                  | 2102                                                        | 1794                                                        |
| <b>Diammonium<br/>phosphate</b>     | 213                    | 215                                       | 215                                             | 236                                                                                   | 207                                                                                   | 245                                                         | 209                                                         |
| <b>Corn Oil</b>                     | 13                     | 6                                         | 25                                              | 15                                                                                    | 13                                                                                    | 15                                                          | 13                                                          |
| <b>Glucose</b>                      | 2331                   | 1167                                      | 4662                                            | 2577                                                                                  | 2259                                                                                  | 2681                                                        | 2288                                                        |
| <b>Polymer</b>                      | 6                      | 6                                         | 6                                               | 6                                                                                     | 6                                                                                     | 7                                                           | 6                                                           |
| <b>FGD Lime</b>                     | 265                    | 254                                       | 290                                             | 306                                                                                   | 253                                                                                   | 327                                                         | 258                                                         |
| <b>Makeup water<br/>consumption</b> | 70                     | 68                                        | 74                                              | 66                                                                                    | 86                                                                                    | 92                                                          | 68                                                          |
| <b>Co-Produced<br/>Electricity</b>  | 0.105                  | 0.113                                     | 0.090                                           | 0.154                                                                                 | 0.092                                                                                 | 0.164                                                       | 0.098                                                       |

Table S11. Energy and material requirement, in gram, gallon, or mmBtu/mmBtu, for ARHC production in the sensitivity cases, in comparison to the target case

|                                              | Target     | Lower Fuel Yield | Higher Fuel Yield |
|----------------------------------------------|------------|------------------|-------------------|
| <b>Fuel yield (mmBtu/dry ton of biomass)</b> | <b>7.5</b> | <b>6.8</b>       | <b>8.3</b>        |
| <b>Magnesium oxide</b>                       | 5.1        | 5.6              | 4.6               |
| <b>Fresh olivine</b>                         | 391.7      | 432.7            | 356.8             |
| <b>Tar reformer catalyst</b>                 | 8.7        | 9.7              | 8.0               |
| <b>Alcohol synthesis catalyst</b>            | 29.1       | 31.7             | 29.5              |
| <b>Med Temp xx-ZSM-5 Catalyst</b>            | 1.0        | 1.1              | 1.0               |
| <b>High temp xx-ZSM-5 Catalyst</b>           | 0.7        | 0.6              | 0.6               |
| <b>DEPG solvent</b>                          | 1.3        | 1.4              | 1.2               |
| <b>Amine makeup</b>                          | 0.1        | 0.2              | 0.1               |
| <b>Diesel fuel</b>                           | 0.0        | 0.0              | 0.0               |
| <b>Makeup water consumption</b>              | 50         | 54               | 30                |
| <b>External electricity</b>                  | 0.033      | 0                | 0.049             |
| <b>Diesel</b>                                | 0.002      | 0.002            | 0.002             |
| <b>Natural gas</b>                           | 0          | 0                | 0.074             |

## PM<sub>2.5</sub> emissions

For isobutanol in the target case, tailpipe PM<sub>2.5</sub> emissions accounts for 36% of the total life-cycle emissions, followed by biorefinery conversion (20%), embedded emissions associated with production of fertilizers (18%), harvest and collection of herbaceous feedstocks by diesel-powered equipment (16%), and biomass depot preprocessing (6%). Life-cycle PM<sub>2.5</sub> emissions in the sensitivity cases vary slightly because of relatively small variations in the emissions during the conversion step. As a result, all these cases have higher life-cycle PM<sub>2.5</sub> emissions than those of petroleum gasoline.

For ARHC in the target case, emissions from fuel combustion accounts for 45% of the total, followed by landing preprocessing (25%), biomass depot preprocessing (11%), biomass transportation (8%), and biorefinery conversion (7%). The higher and lower fuel yield sensitivity

cases show a similar level of life-cycle  $\text{PM}_{2.5}$  emissions as a result of tradeoffs between emissions from biomass conversion and biomass logistics that are impacted by the fuel yields. For both the isobutanol and ARHC pathways, tailpipe  $\text{PM}_{2.5}$  emissions based on our assumption that these two bio-blendstocks have the same tailpipe  $\text{NO}_x$  emission factors as that of petroleum gasoline present the largest uncertainty due to lack of data about combustion emissions of isobutanol and ARHC in spark-ignition engines at this point. Further analysis is needed when information on emissions from engine combustion testing becomes available.

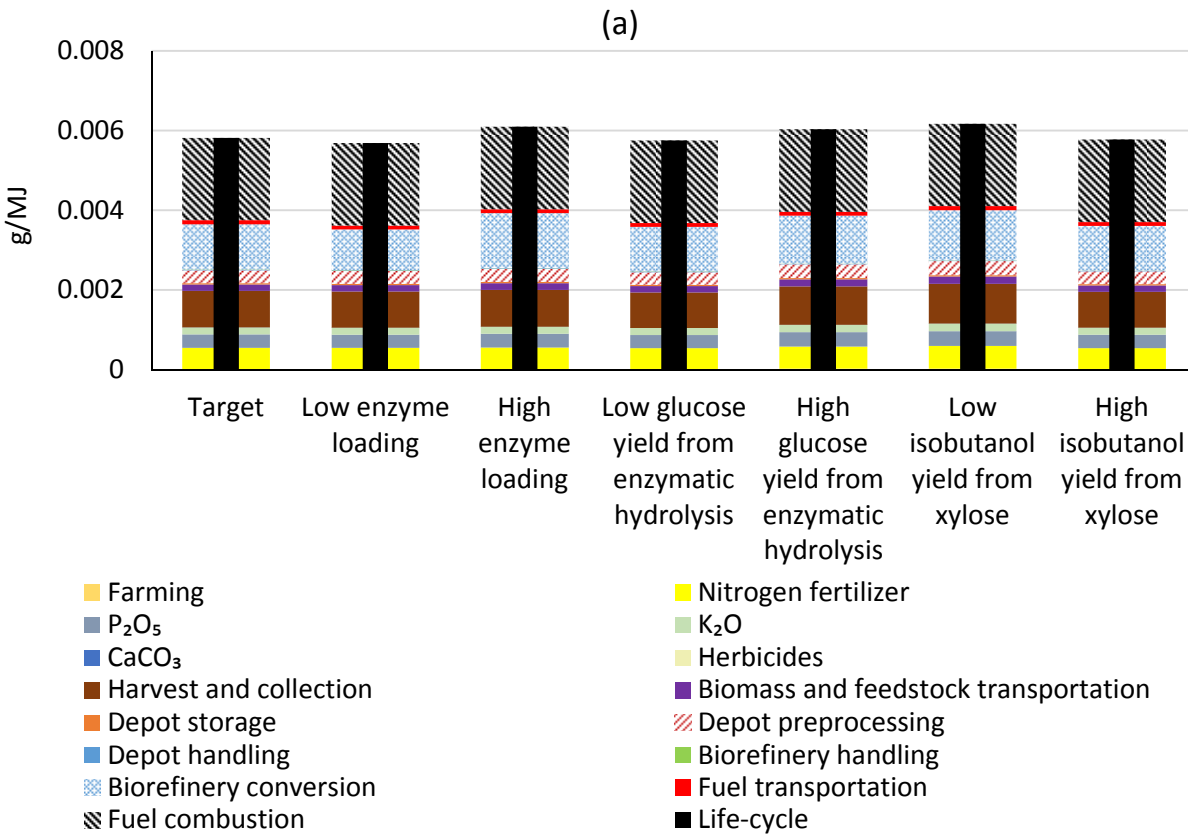

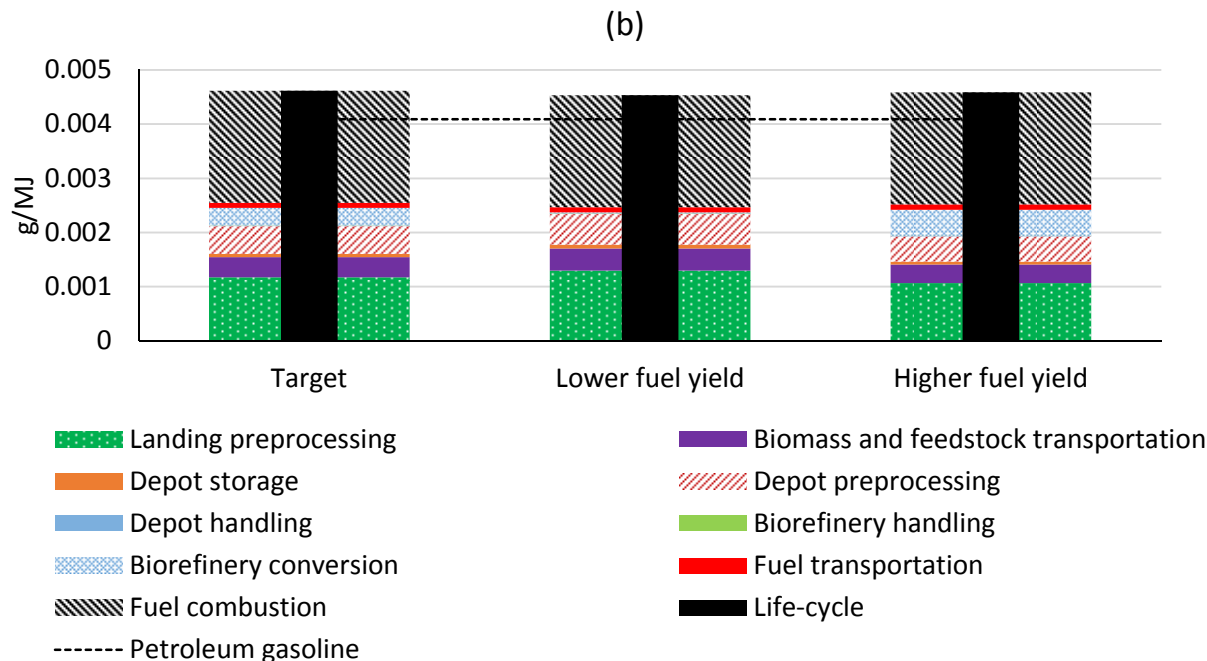

Figure S4. Life-cycle PM<sub>2.5</sub> emissions of biomass-derived (a) isobutanol and (b) ARHC, in comparison to those of petroleum gasoline (solid black line)

## References

1. United States Environmental Protection Agency (EPA). Gasoline benzene requirements 80.1230. Annual Average benzene standard. . Electronic Code of Federal Regulations. Title 40- Chapter I- Subchapter C -Part 80 - Subpart I. **2017**. [https://www.ecfr.gov/cgi-bin/retrieveECFR?gp=&SID=75ebc0d5d7c6e9c68b80882b8fbbc10a&mc=true&n=sp40.19.80.1&r=SUBPART&ty=HTML#sg40.19.80\\_11200\\_680\\_11219.sg36](https://www.ecfr.gov/cgi-bin/retrieveECFR?gp=&SID=75ebc0d5d7c6e9c68b80882b8fbbc10a&mc=true&n=sp40.19.80.1&r=SUBPART&ty=HTML#sg40.19.80_11200_680_11219.sg36)
2. United States Environmental Protection Agency (EPA). Gasoline Mobile Source Air Toxics. **2017**. <https://www.epa.gov/gasoline-standards/gasoline-mobile-source-air-toxics>

3. California Air Resources Board (CARB). Title 13: the California Reformulated Gasoline Regulations, California Code of Regulations, Sections 2250-2273.5 Reflecting Amendments Effective. **2012**.  
[https://www.arb.ca.gov/fuels/gasoline/100912CaRFG\\_regs](https://www.arb.ca.gov/fuels/gasoline/100912CaRFG_regs).
4. U.S. Department of Energy (DOE). Bioenergy Technologies Office Multi-Year Program Plan. March **2016**. <https://www.energy.gov/eere/bioenergy/downloads/bioenergy-technologies-office-multi-year-program-plan-march-2016-sections>
5. Davis, R.; Tao, L.; Tan, E.C.D.; Biddy, M.; Beckham, G.T.; Scarlata, C. Process Design and Economics for the Conversion of Lignocellulosic Biomass to Hydrocarbons: Dilute-Acid and Enzymatic Deconstruction of Biomass to Sugars and Biological Conversion of Sugars to Hydrocarbons. **2013**. National Renewable Energy Laboratory (NREL), Golden, CO.
6. Humbird, R. D.; Tao, L.; Kinchin, C.; Hsu, D.; Aden, A.; Swchoen, P.; Lukas, J.; Olthof, B.; Worley, M.; Sexton, D.; Dudgeon, D. Process Design and Economics for Biochemical Conversion of Lignocellulosic Biomass to Ethanol: Dilute-Acid Pretreatment and Enzymatic Hydrolysis of Corn Stover. **2011**. National Renewable Energy Laboratory (NREL), Golden, CO.
7. Tao, L.; Tan, E. C.D.; McCormick, R.; Zhang, M.; Aden, A.; He, X.; Zigler, B. Techno-Economic Analysis and Life-Cycle Assessment of Cellulosic Isobutanol and Comparison with Cellulosic Ethanol and n-butanol. *Biofuels, Bioproducts and Biorefining*. **2014**, 8 (1), 30-48. DOI: 10.1002/bbb.1431

8. Hawkins, A.; Johnston, G. 2016. Production of Lignocellulosic Isobutanol by Fermentation and Conversion to Biojet. **2016**.  
<https://www.youtube.com/watch?v=S6jNOOMdimk&feature=youtu.be>.
9. Atsumi, S.; Hanai, T.; Liao, J. C. Non-fermentative pathways for synthesis of branched-chain higher alcohols as biofuels. *Nature*, **2008**, *451* (7174), 86-89.
10. Akita, H.; Nakashima, N.; Hoshino, T. Bacterial production of isobutanol without expensive reagents. *Applied microbiology and biotechnology*. **2015**, *99* (2), 991-999.
11. Dutta, A.; Talmadge, M.; Hensley, J.; Worley, M.; Dudgeon, D.; Barton, D.; Groenendijk, P.; Ferrari, D.; Stears, B.; Searcy, E.; Wright, C.; Hess, J. Process Design and Economics for Conversion of Lignocellulosic Biomass to Ethanol. NREL/TP-5100-51400. **2011**. National Renewable Energy Laboratory, Golden, Colorado.  
<http://www.nrel.gov/docs/fy11osti/47764.pdf>.
12. Narula, C.; Li, Z.; Casbeer, E.; Geiger, R.; Moses-Debusk, M.; Keller, M.; Buchanan, M.; Davison, B. Heterobimetallic Zeolite, InV-ZSM-5, Enables Efficient Conversion of Biomass Derived Ethanol to Renewable Hydrocarbons. *Scientific Reports*. **2015**, *5*, DOI 10.1038/srep16039.
13. Narula, C.; Davison, B. Catalytic Conversion of Alcohols Having at Least Three Carbon Atoms to Hydrocarbon Blendstock. U.S. Patent Application US 2016/0032195 A1, February 4, **2016**.

14. Li, Z.; Lepore, A.; Davison, B.; Narula, C. Catalytic Conversion of Biomass-Derived Ethanol to Liquid Hydrocarbon Blendstock: Effect of Light Gas Recirculation. *Energy & Fuels*. **2016**, *30* (12), DOI: 10.1021/acs.energyfuels.6b02562.
15. Wang, M.; Han, J.; Dunn, J.B.; Cai, H.; Elgowainy, A. Well-to-wheels energy use and greenhouse gas emissions of ethanol from corn, sugarcane and cellulosic biomass for US use. *Environ. Res. Lett.* **2012**, *7*, 045905. doi:10.1088/1748-9326/7/4/045905
16. Canter, C.E.; Dunn, J.B.; Han, J.; Wang, Z.; Wang, M. Policy Implications of Allocation Methods in the Life Cycle Analysis of Integrated Corn and Corn Stover Ethanol Production. *BioEnergy Res.* **2016**, *9*, 77–87. doi:10.1007/s12155-015-9664-4
17. Mohammad, R.; Thompson, D.N.; Hu, H.; Hartley, D.; Nguyen, Q.; Cai, H. Herbaceous feedstock 2017 State of Technology Report. Technical Report. INL/LTD-17-43738 Rev.2b. Idaho National Laboratory. **2018**.
18. Argonne National Laboratory (ANL). The Greenhouse gases, Regulated Emissions, and Energy use in Transportation (GREET) Model. **2017**. <http://greet.es.anl.gov>.
19. Hartley, D.; Thompson, D.N.; Hu, H.; Cai, H. Woody feedstock 2017 feedstock 2017 State of Technology Report. *Technical Report*. INL/LTD-17-43459 Rev.1b. Idaho National Laboratory. **2018**.
